# Supplementary material
Source: PubMed Central journal article supplement (PMC4700112)

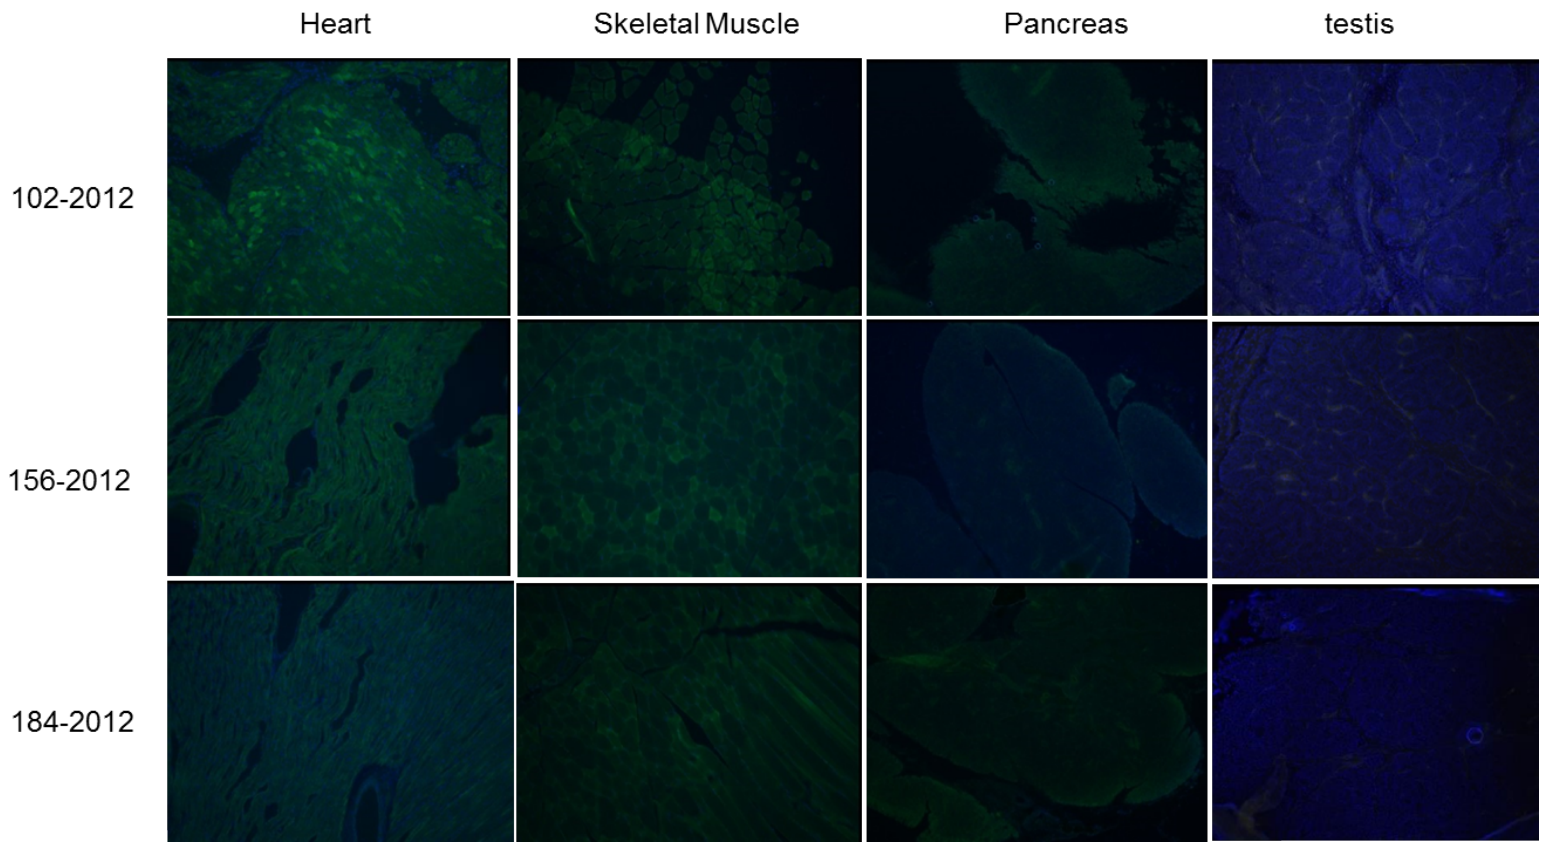

**a**

**Animal#**

**22-2012**

**106-2012**

**110-2012**

**AAV3B WT-rhCG  
(D91)**

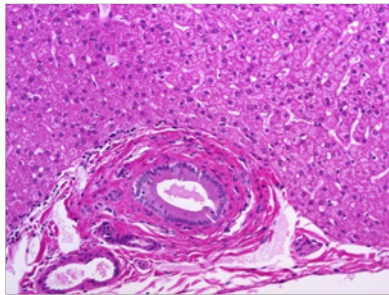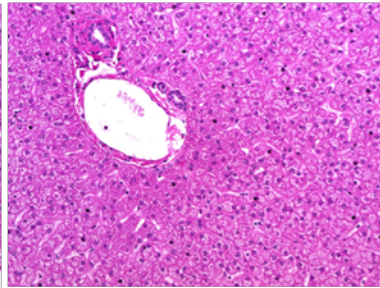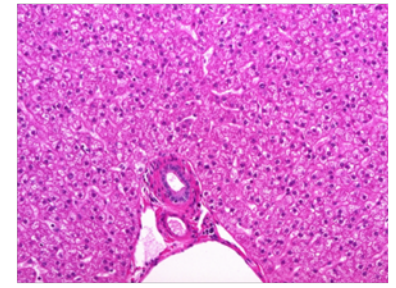

**Animal#**

**133-2012**

**136-2012**

**176-2012**

**AAV3B.ST-rhCG  
(D91)**

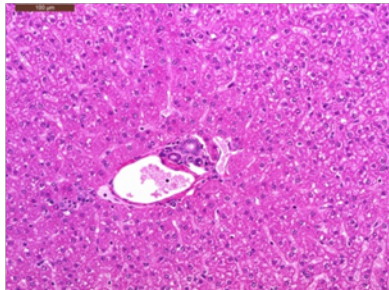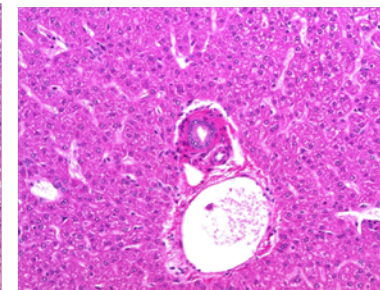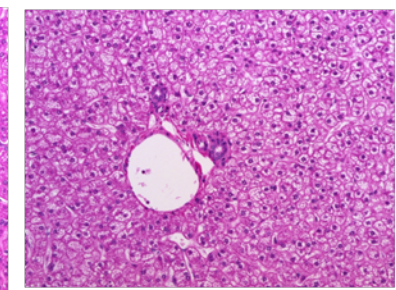

**Animal#**

**102-2012**

**156-2012**

**184-2012**

**AAV3B.ST-EGFP  
(D7)**

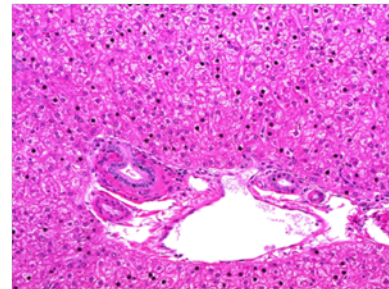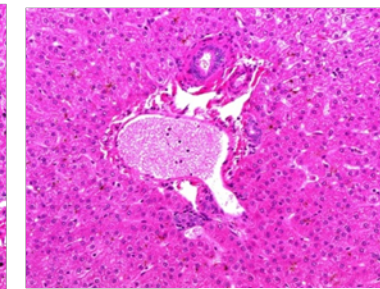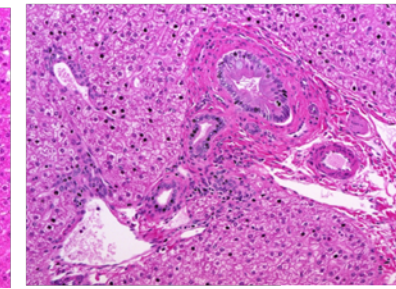

**b**

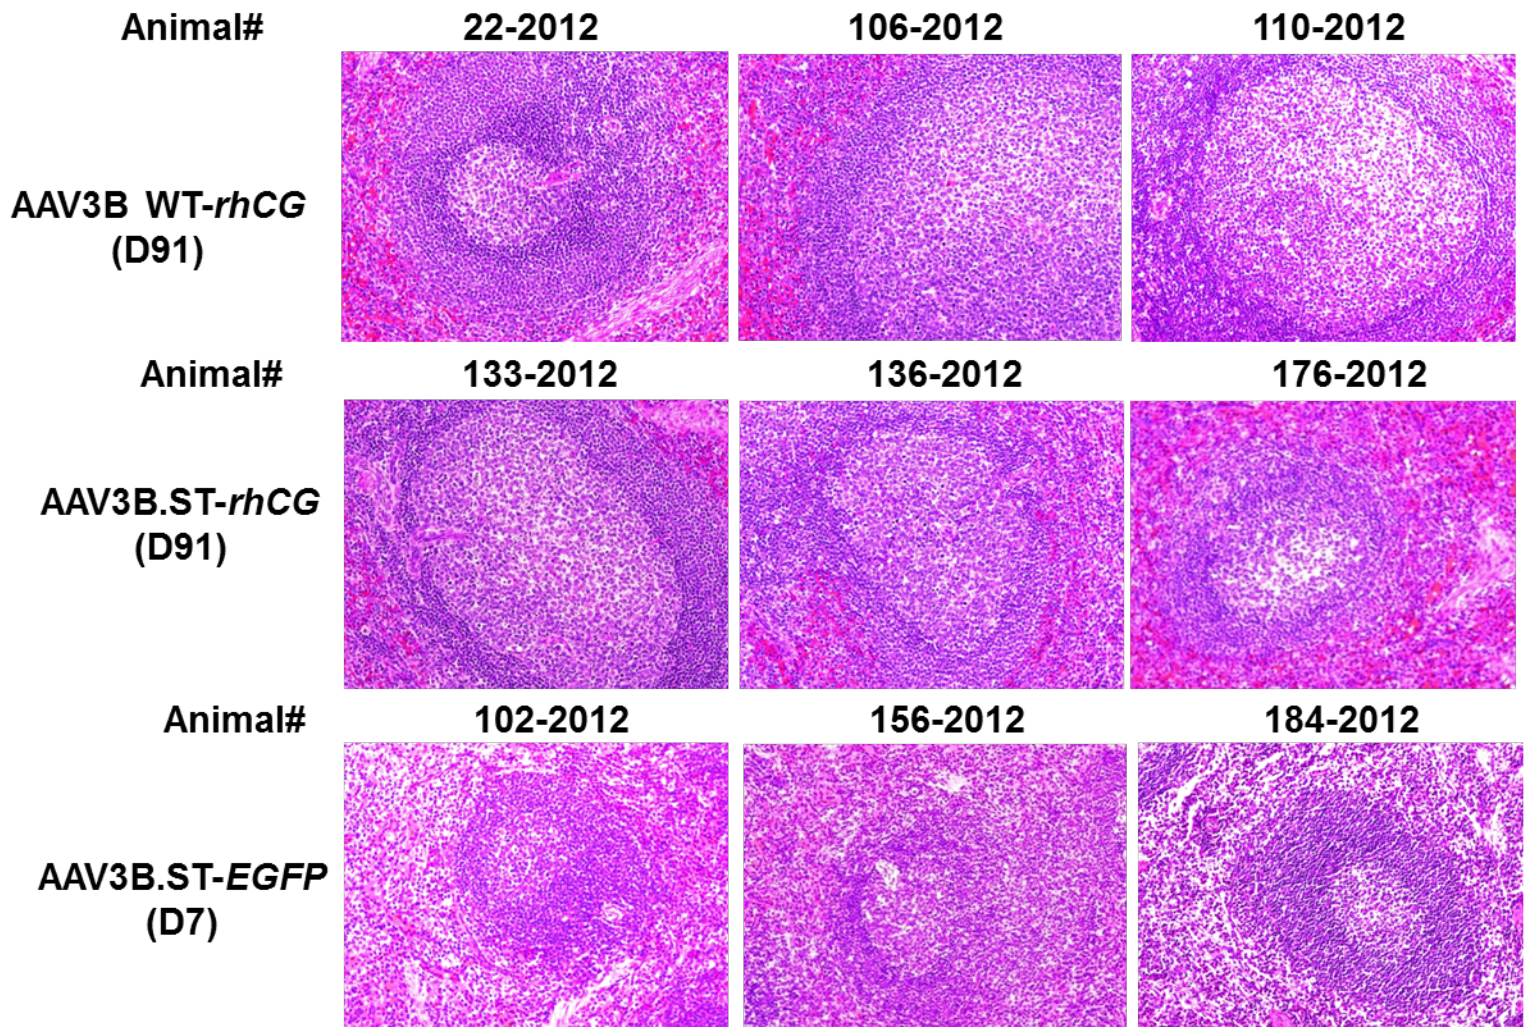

Supplement: mt2015174x1.pdf [file mt2015174x1.pdf]
